# Supplementary material
Source: PubMed Central journal article supplement (PMC1838505)

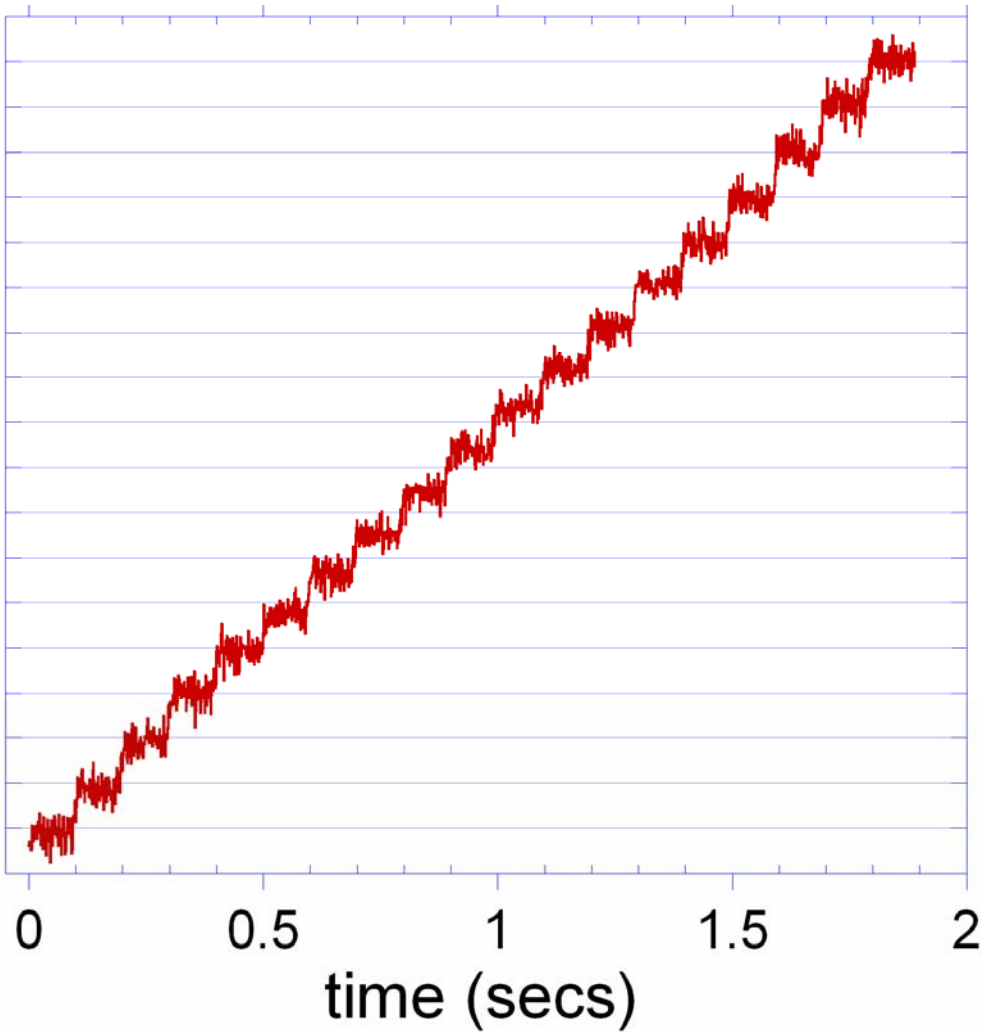

Supplement: pnas_0700145104_1.pdf [file pnas_0700145104_1.pdf]

a)

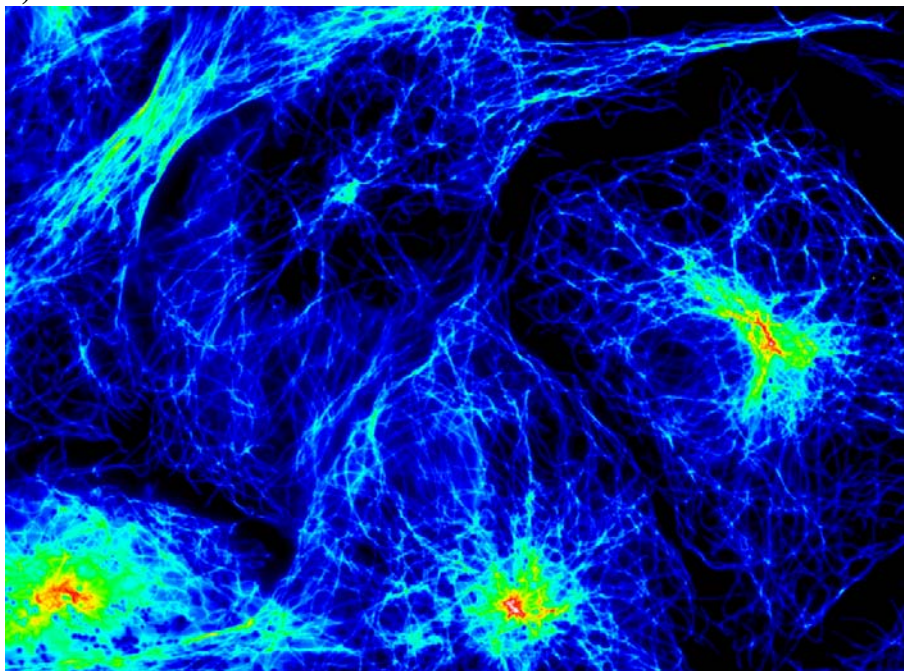

b)

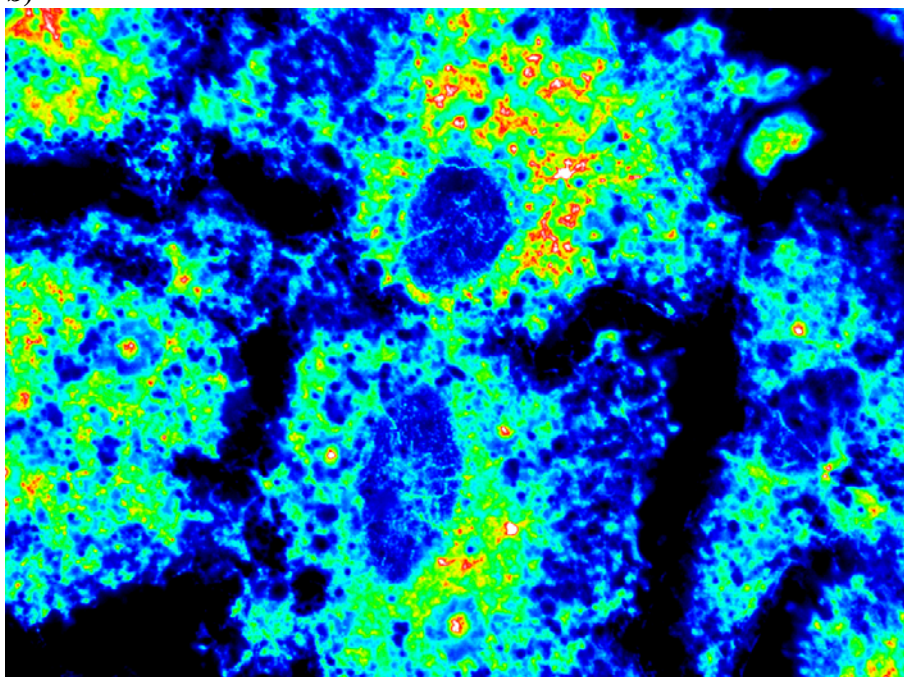

Supplement: pnas_0700145104_3.pdf [file pnas_0700145104_3.pdf]
